# Supplementary material for: The Olfactory Transcriptomes of Mice
Source: PubMed Central journal article supplement (PMC4154679; doi:10.1371/journal.pgen.1004593), 2014-09-04

## Dataset S8

### OR and VR transcripts that have introns within the coding sequence.

‘Not expressed’ means there are not enough sequencing reads to conclude whether the intron is supported or not.

| geneID             | transcriptID       | geneName    | reconstructed transcriptID    | intron in coding sequence | comments                                                                                                                                                                   |
|--------------------|--------------------|-------------|-------------------------------|---------------------------|----------------------------------------------------------------------------------------------------------------------------------------------------------------------------|
| ENSMUSG00000068810 | ENSMUST00000090702 | Olf1187-ps1 | --                            | not expressed             |                                                                                                                                                                            |
| ENSMUSG00000068810 | ENSMUST00000177576 | Olf1187-ps1 | --                            | not expressed             |                                                                                                                                                                            |
| ENSMUSG00000081724 | ENSMUST00000174675 | Olf129      | CUFFORT_0705;<br>CUFFORT_0706 | supported                 | The transcript annotated in Ensembl is truncated and produces a 70 aa protein; The reconstructed transcripts have the same intron but produce full length ORFs (320 aa).   |
| ENSMUSG00000063240 | ENSMUST00000173610 | Olf133      | CUFFORT_0648                  | supported                 | The transcript annotated in Ensembl is truncated and produces a 109 aa protein; The reconstructed transcripts have the same intron but produce a full length ORF (327 aa). |
| ENSMUSG00000073769 | ENSMUST00000106360 | Olf1331     | CUFFORT_1394                  | supported                 |                                                                                                                                                                            |
| ENSMUSG00000073770 | ENSMUST00000106361 | Olf1333     | CUFFORT_1413                  | supported                 |                                                                                                                                                                            |
| ENSMUSG00000093877 | ENSMUST00000086319 | Olf1348     | CUFFORT_2049;<br>CUFFORT_2050 | supported                 |                                                                                                                                                                            |
| ENSMUSG00000063583 | ENSMUST00000079790 | Olf1410     | CUFFORT_0008                  | not supported             |                                                                                                                                                                            |
| ENSMUSG00000066896 | ENSMUST00000086473 | Olf18       | CUFFORT_1948                  | supported                 |                                                                                                                                                                            |
| ENSMUSG00000090129 | ENSMUST00000170618 | Olf287      | CUFFORT_2020                  | supported                 |                                                                                                                                                                            |
|                    | ENSMUST00000155603 |             |                               |                           |                                                                                                                                                                            |
|                    | ENSMUST00000141911 |             |                               |                           |                                                                                                                                                                            |
| ENSMUSG00000075427 | ENSMUST00000165379 | Olf288      | --                            | supported                 |                                                                                                                                                                            |

|                                          |                                          |             |                                                |                      |                                                                                                                                                                           |
|------------------------------------------|------------------------------------------|-------------|------------------------------------------------|----------------------|---------------------------------------------------------------------------------------------------------------------------------------------------------------------------|
| ENSMUSG00000061549                       | ENSMUST00000073222                       | Olf301      | CUFFORT_1480                                   | supported            |                                                                                                                                                                           |
| ENSMUSG00000063881                       | ENSMUST00000078952                       | Olf376      | CUFFORT_0282                                   | supported            |                                                                                                                                                                           |
| ENSMUSG00000059623                       | ENSMUST00000071725                       | Olf39       | --                                             | supported            |                                                                                                                                                                           |
| ENSMUSG00000073962                       | ENSMUST00000098213                       | Olf376      | --                                             | <b>not supported</b> |                                                                                                                                                                           |
| ENSMUSG00000041885                       | ENSMUST00000042676                       | Olf680-ps1  | --                                             | <b>not expressed</b> |                                                                                                                                                                           |
| ENSMUSG00000059768                       | ENSMUST00000071242                       | Olf682-ps1  | --                                             | <b>not expressed</b> |                                                                                                                                                                           |
| ENSMUSG00000066914                       | ENSMUST00000086496                       | Olf831-ps1  | --                                             | <b>not expressed</b> |                                                                                                                                                                           |
| ENSMUSG00000058491                       | ENSMUST00000075717                       | Olf869      | --                                             | supported            |                                                                                                                                                                           |
| ENSMUSG00000066897                       | ENSMUST00000086474                       | Olf872      | CUFFORT_1855                                   | supported            |                                                                                                                                                                           |
| ENSMUSG00000096356                       | ENSMUST00000072290                       | Olf889      | CUFFORT_1876                                   | <b>not supported</b> |                                                                                                                                                                           |
| ENSMUSG00000050813                       | --                                       | Olf332      | CUFFORT_0312                                   | lowly supported      | This transcript hasn't been reported in Ensembl. The intron leads to a deletion of 28 aa; the product might or might not be a functional receptor                         |
| ENSMUSG00000079064                       | ENSMUST00000110449                       | Vmn1r-ps123 | --                                             | <b>not expressed</b> |                                                                                                                                                                           |
| ENSMUSG00000091638                       | ENSMUST00000168794                       | Vmn1r113    | --                                             | <b>not expressed</b> |                                                                                                                                                                           |
| ENSMUSG00000074311                       | ENSMUST00000173668                       | Vmn1r139    | --                                             | supported            |                                                                                                                                                                           |
| ENSMUSG00000091662<br>ENSMUSG00000091662 | ENSMUST00000176284<br>ENSMUST00000176707 | Vmn1r69     | CUFFVRT_0890,<br>CUFFVRT_0892,<br>CUFFVRT_0893 | supported            | The transcripts annotated in Ensembl are truncated and produce a 57 aa protein; The reconstructed transcripts have the same intron but produce full length ORFs (338 aa). |

The IGV screenshots with the mapped reads to the gene models are below. The Ensembl gene models are in red and additional transcripts reconstructed by Cufflinks are in black. The non coding regions are in grey for all. Sequencing fragments are drawn in grey below, and the blue lines join reads that span exon junction. For the genes where the intron is not supported all six sequenced samples are shown. For all others, a representative sample is presented.

**Olf129 – Supported**

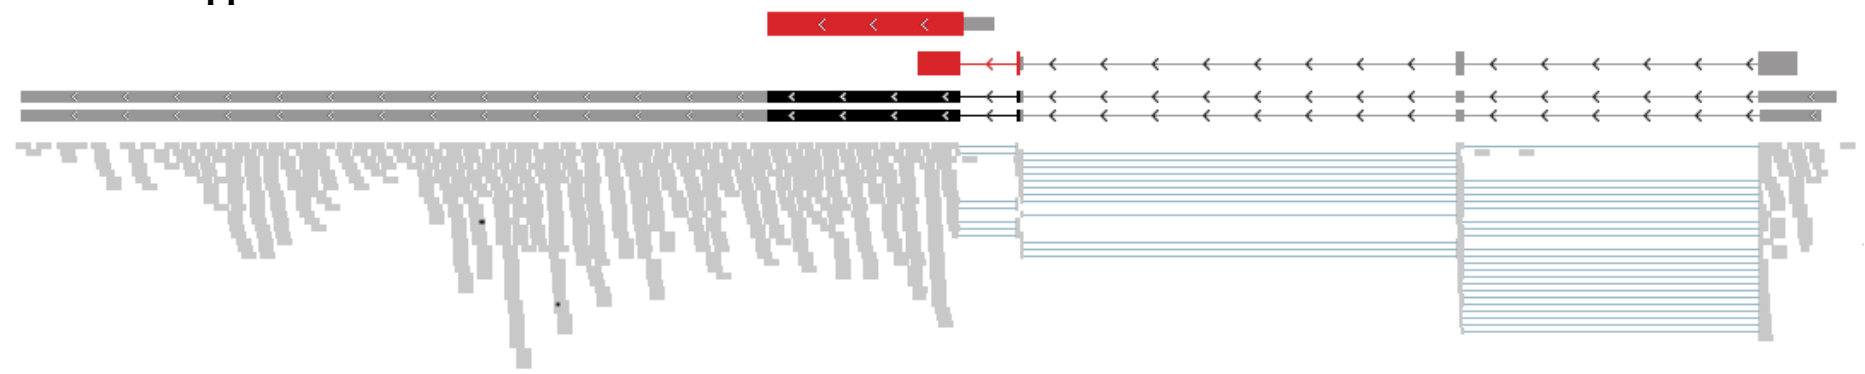

**Olf133 – Supported**

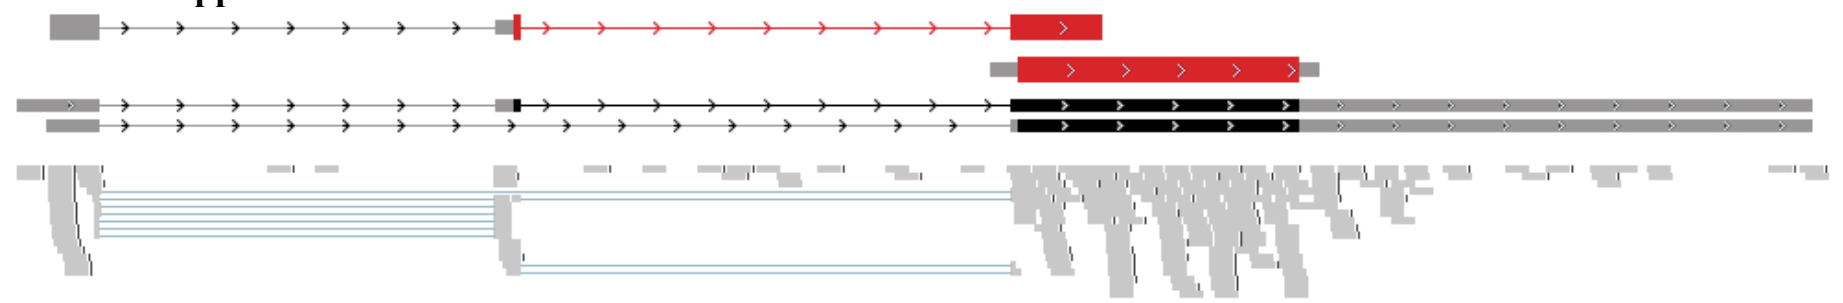

### Olfr1331 – Supported

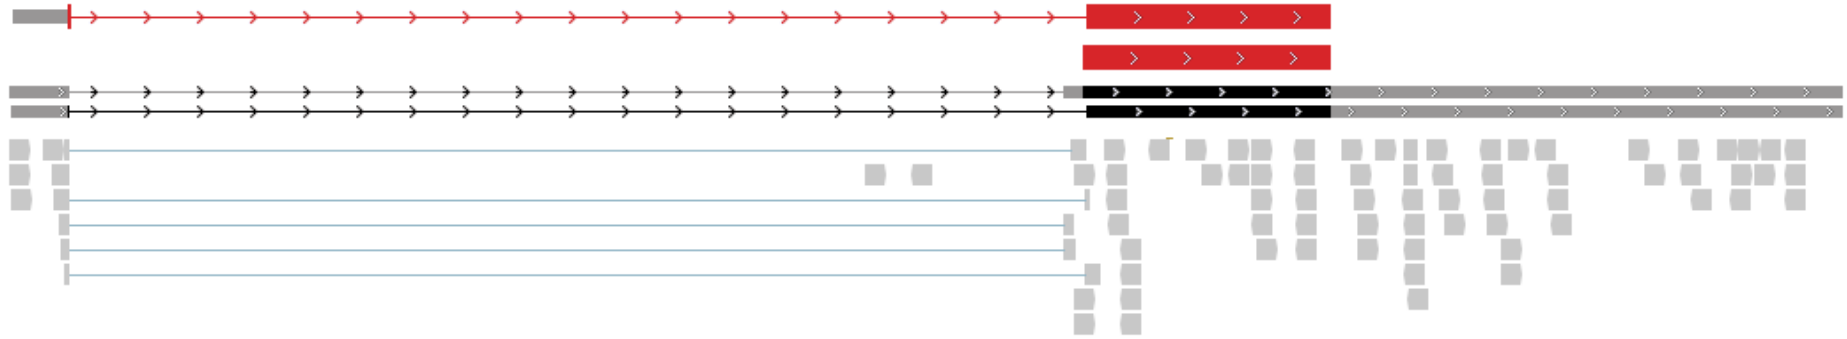

### Olfr1333 – Supported

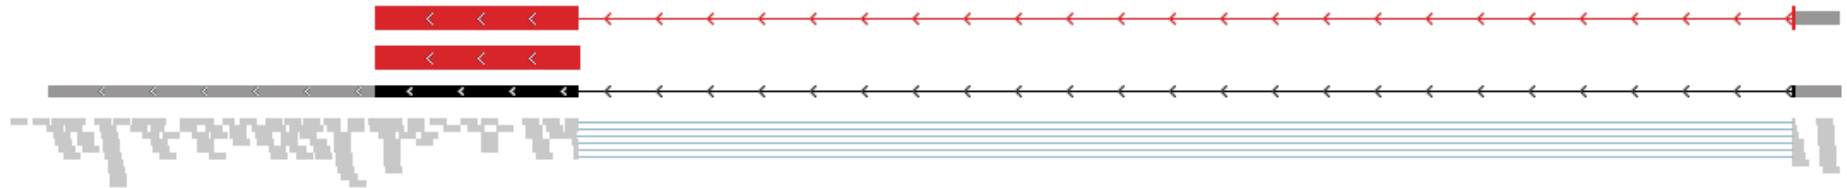

### Olfr18 – Supported

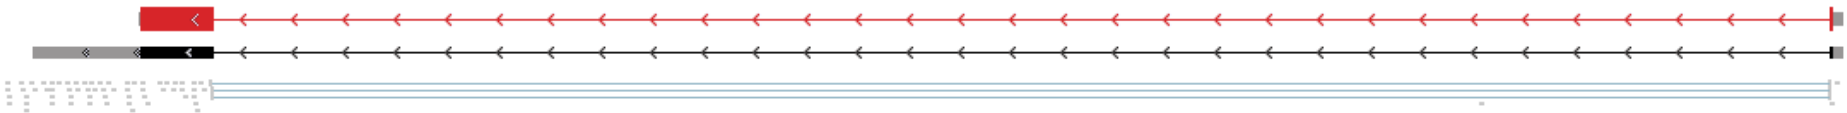

**Olf1348 – Supported**

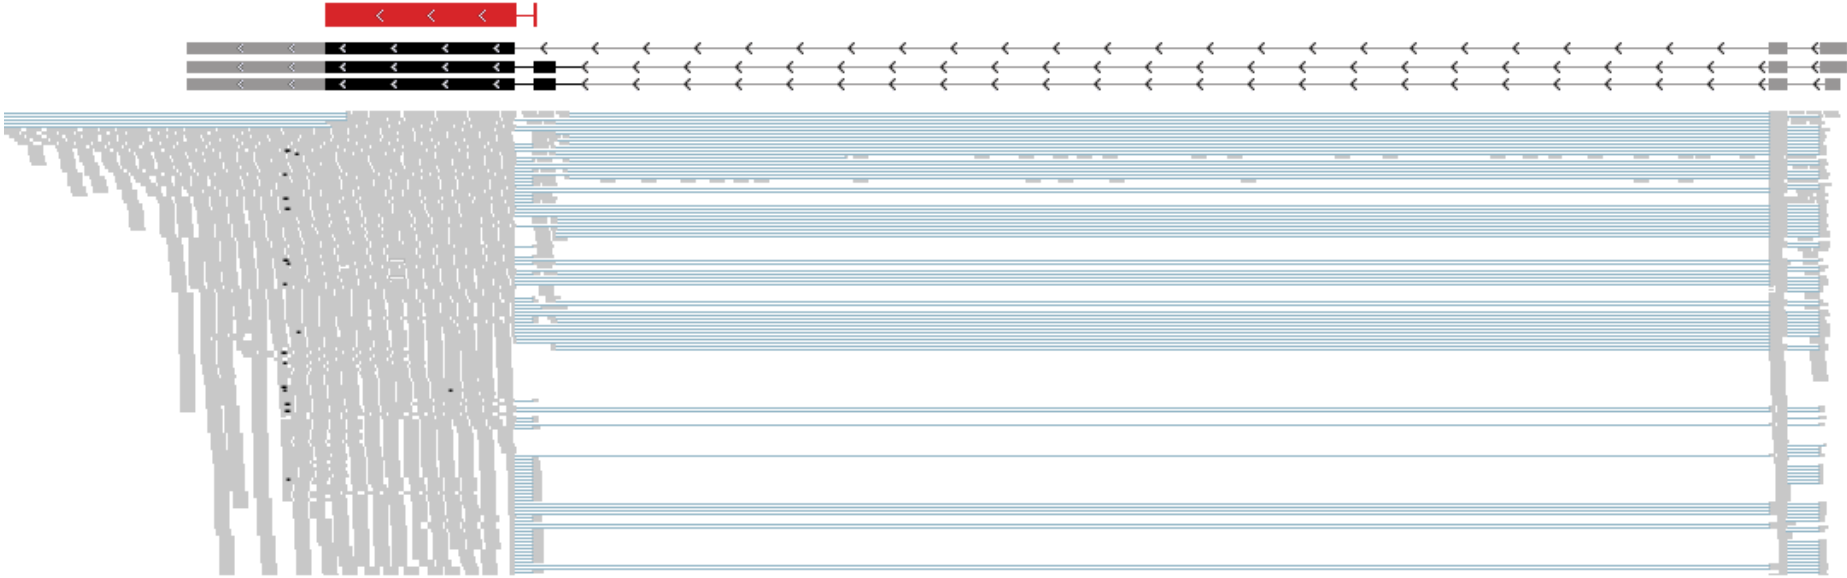

# Olfr1410 – Not supported

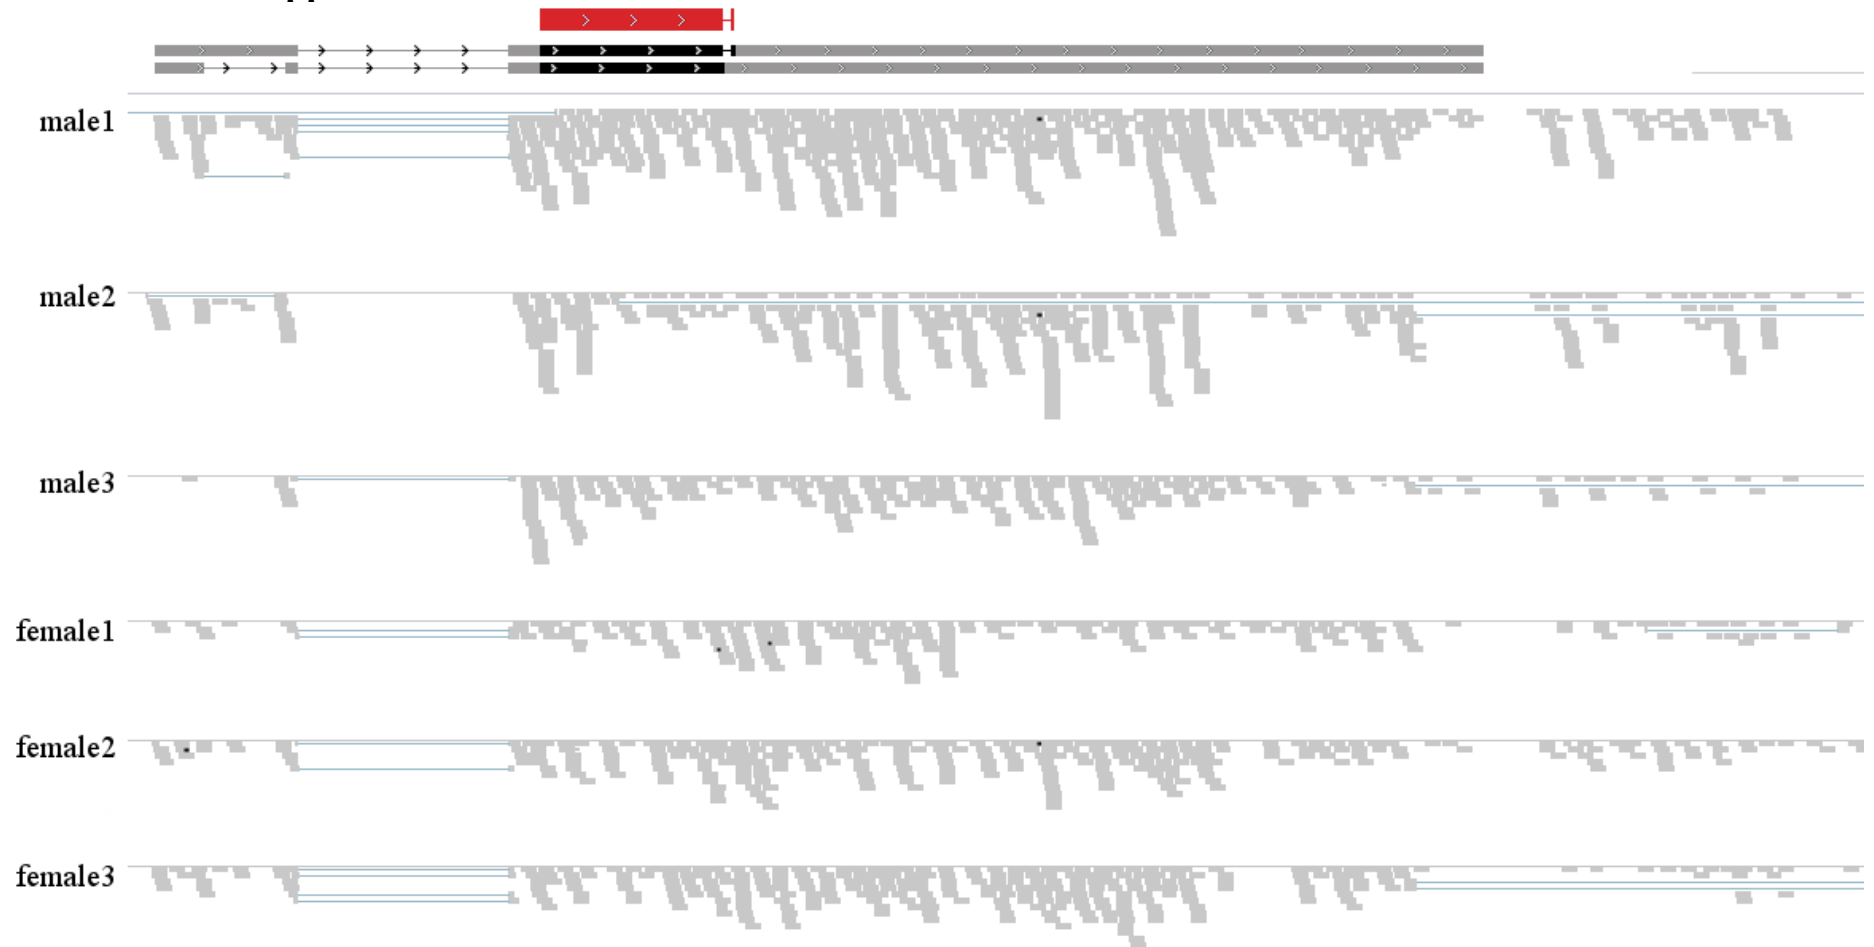

# Olf287 – Supported

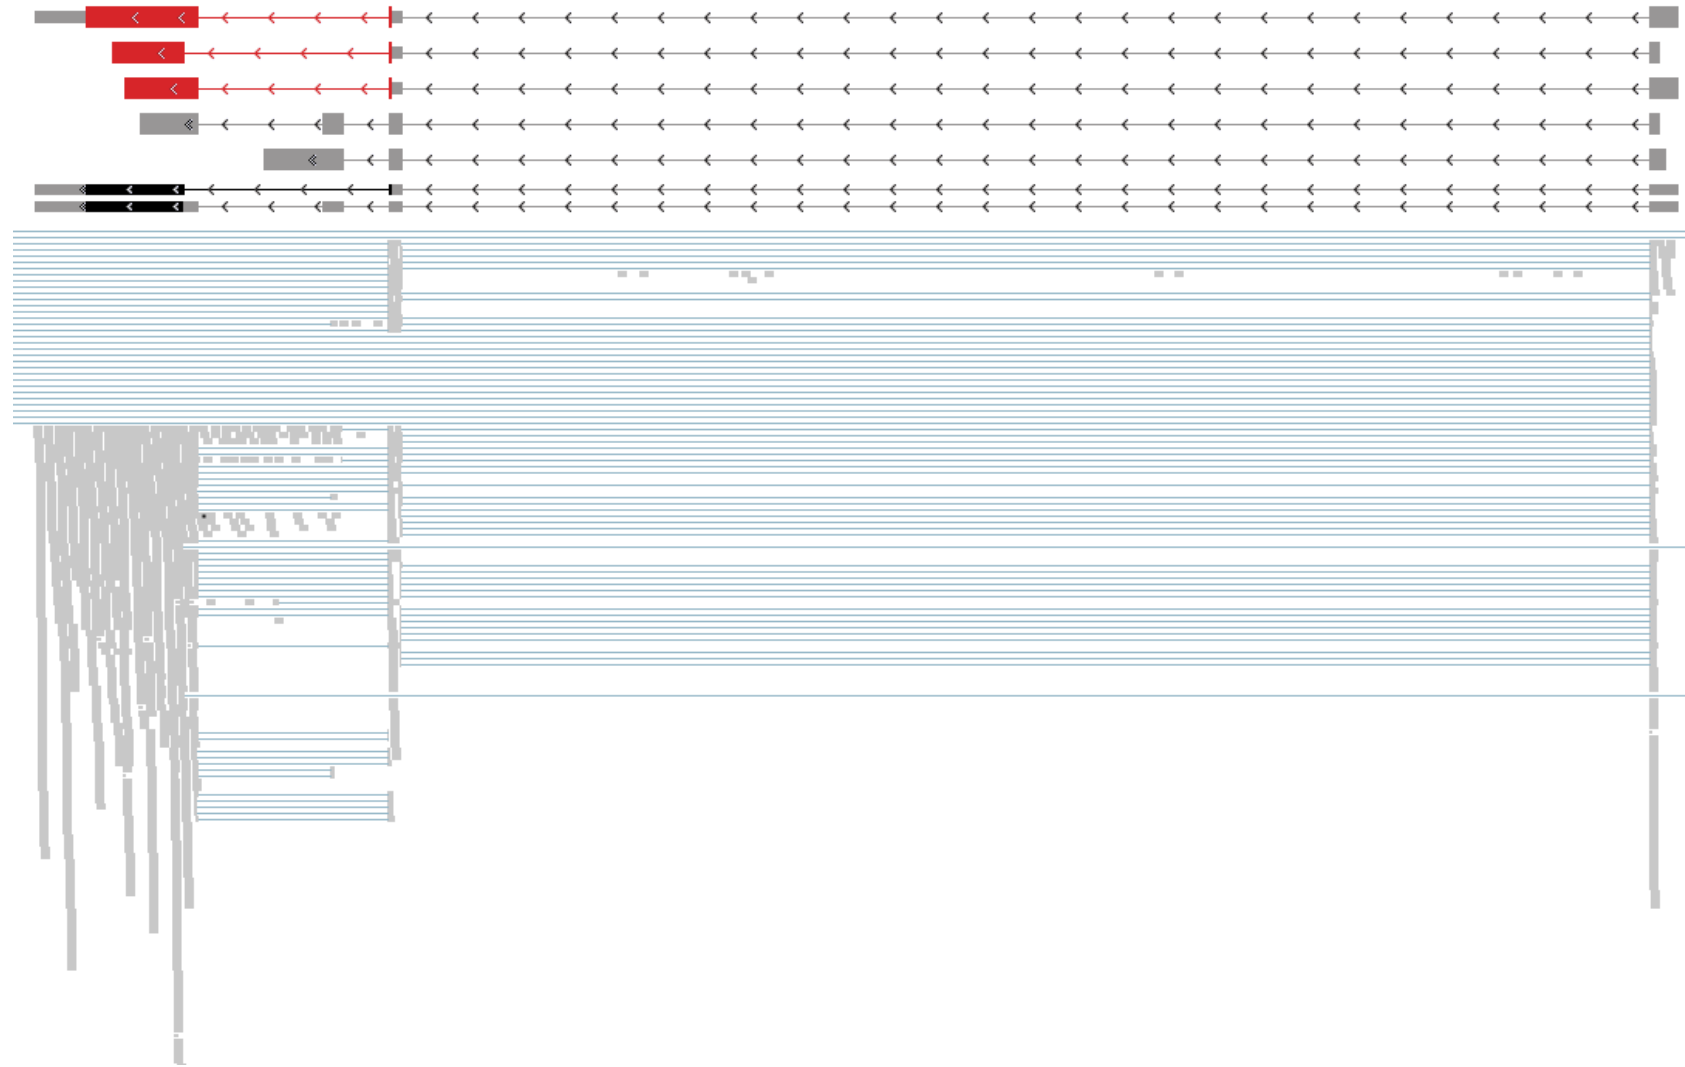

**Olf288 – Supported**

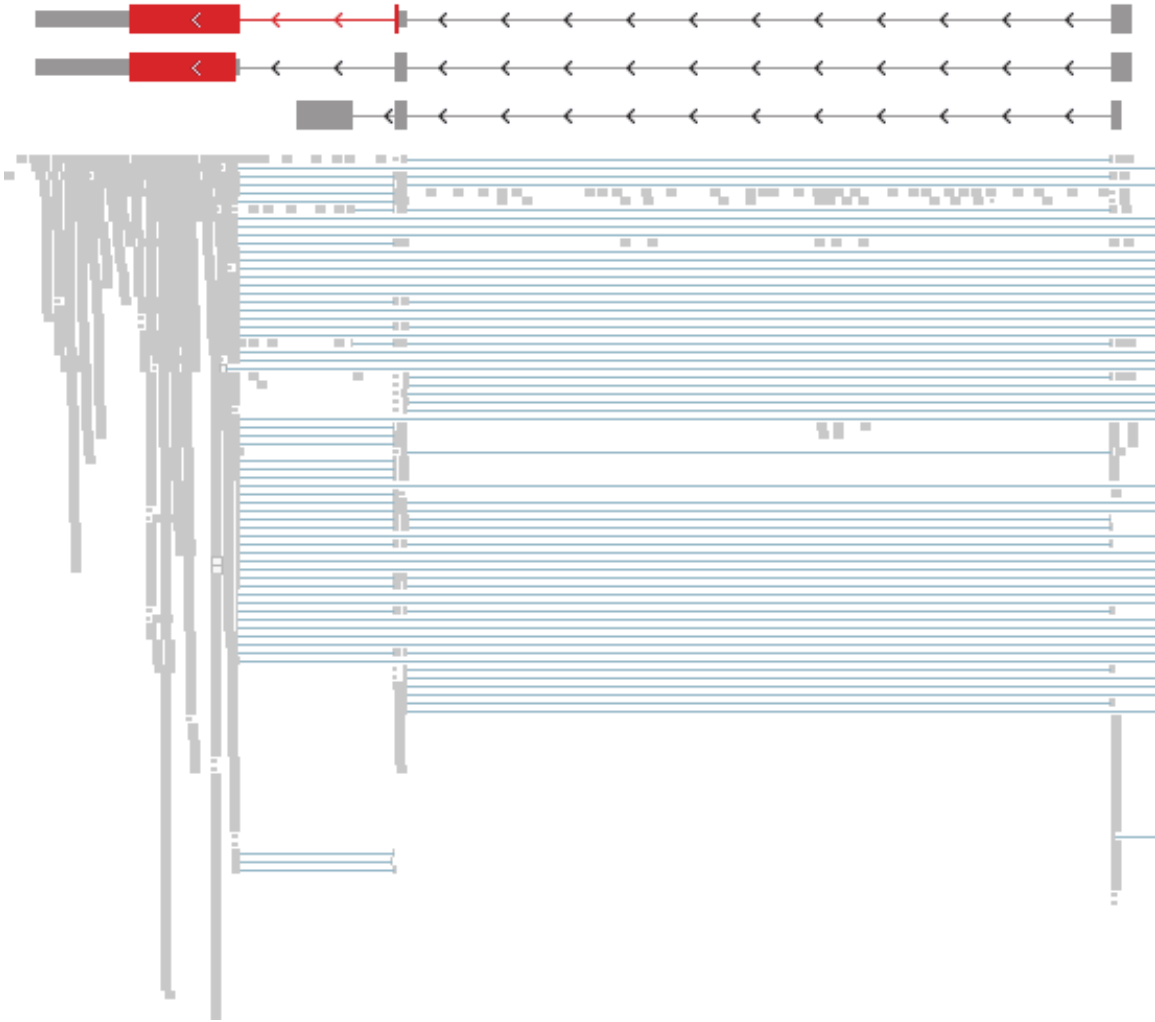



### Olfr301 – Supported

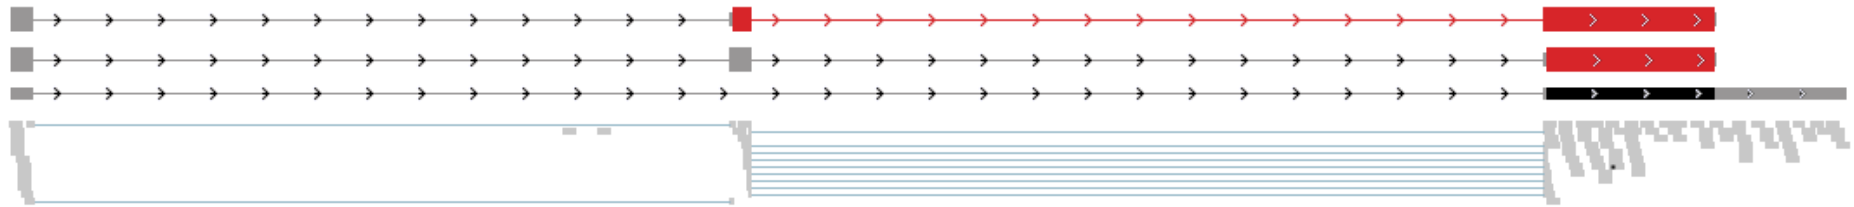

### Olfr376 – Supported

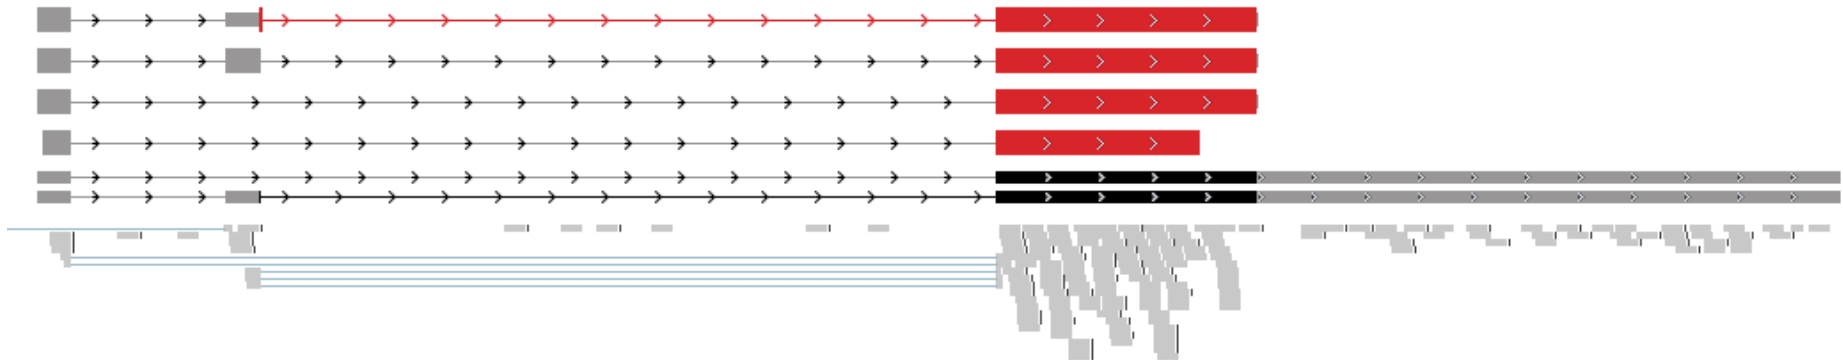

### Olfr39 – Supported

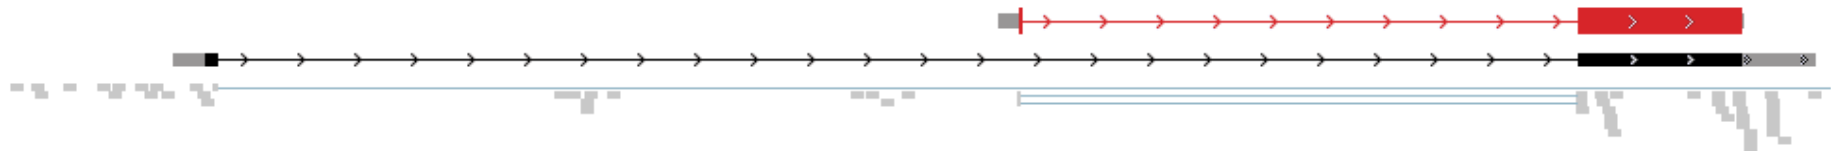

# Olf576 – Not supported

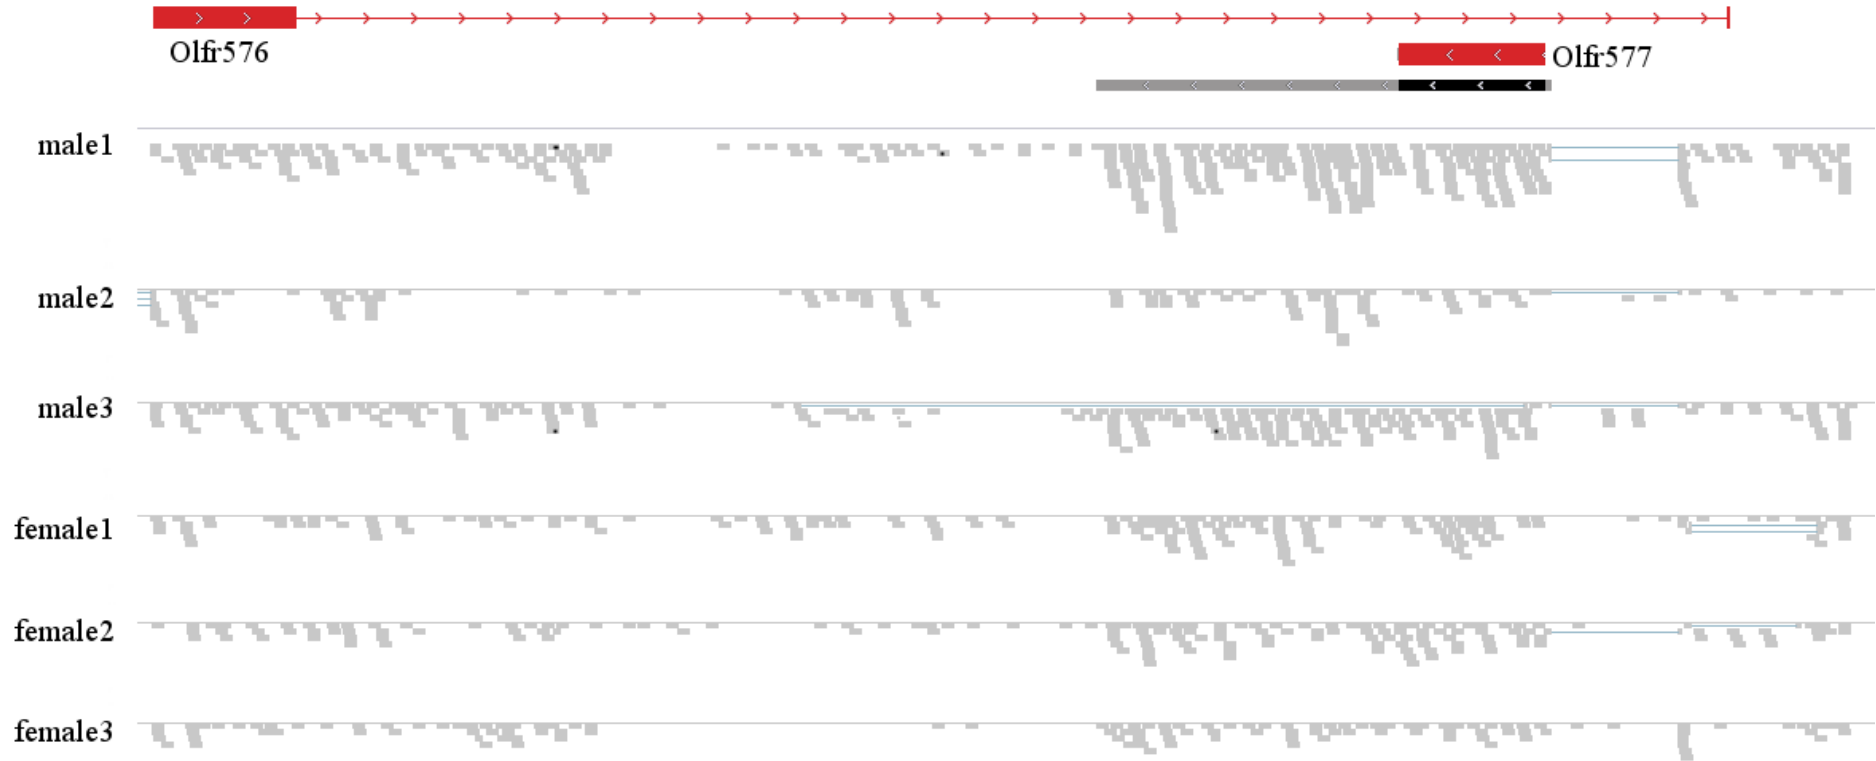

**Olf869 – Supported**

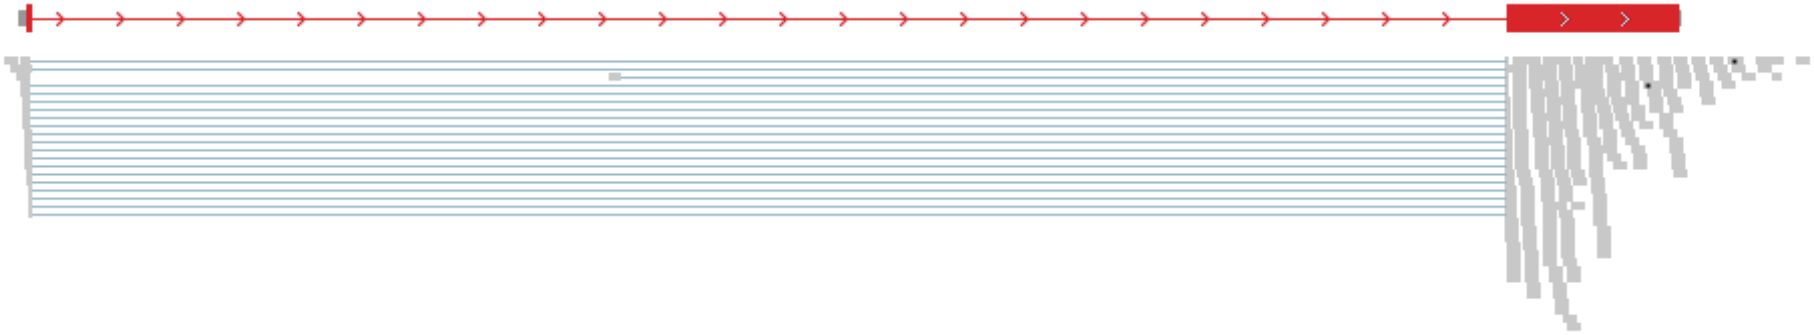

**Olf872 – Supported**

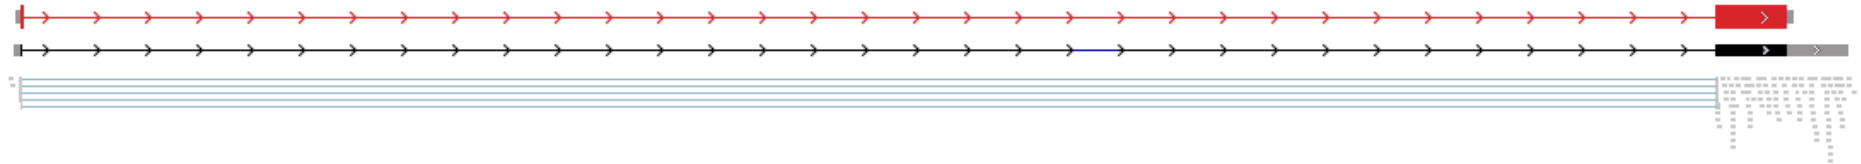

**Olf889 – Not supported**

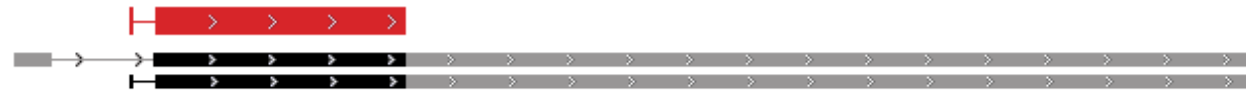

male1

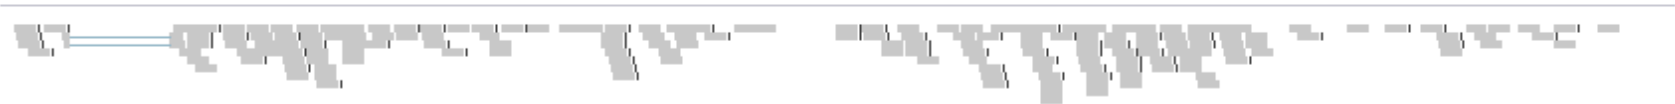

male2

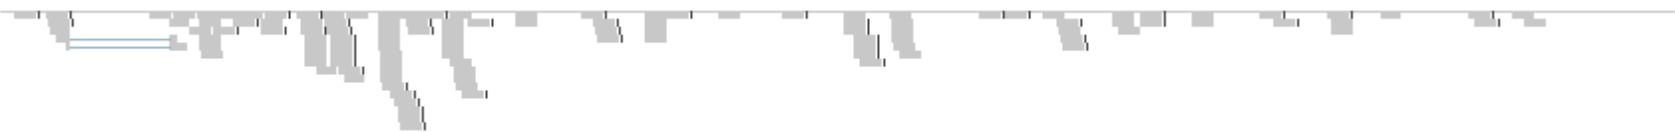

male3

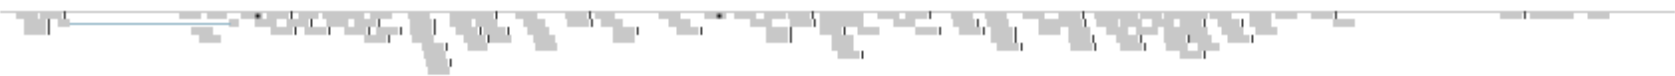

female1

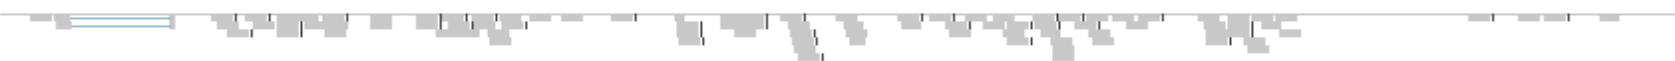

female2

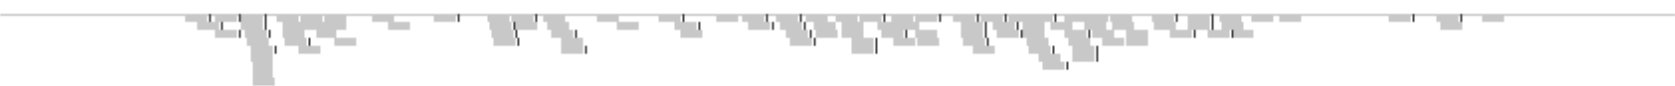

female3

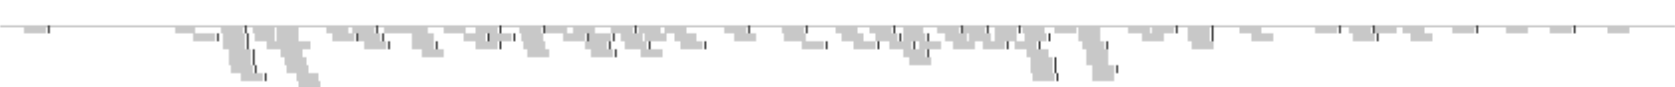

**Olf332 – Lowly supported**

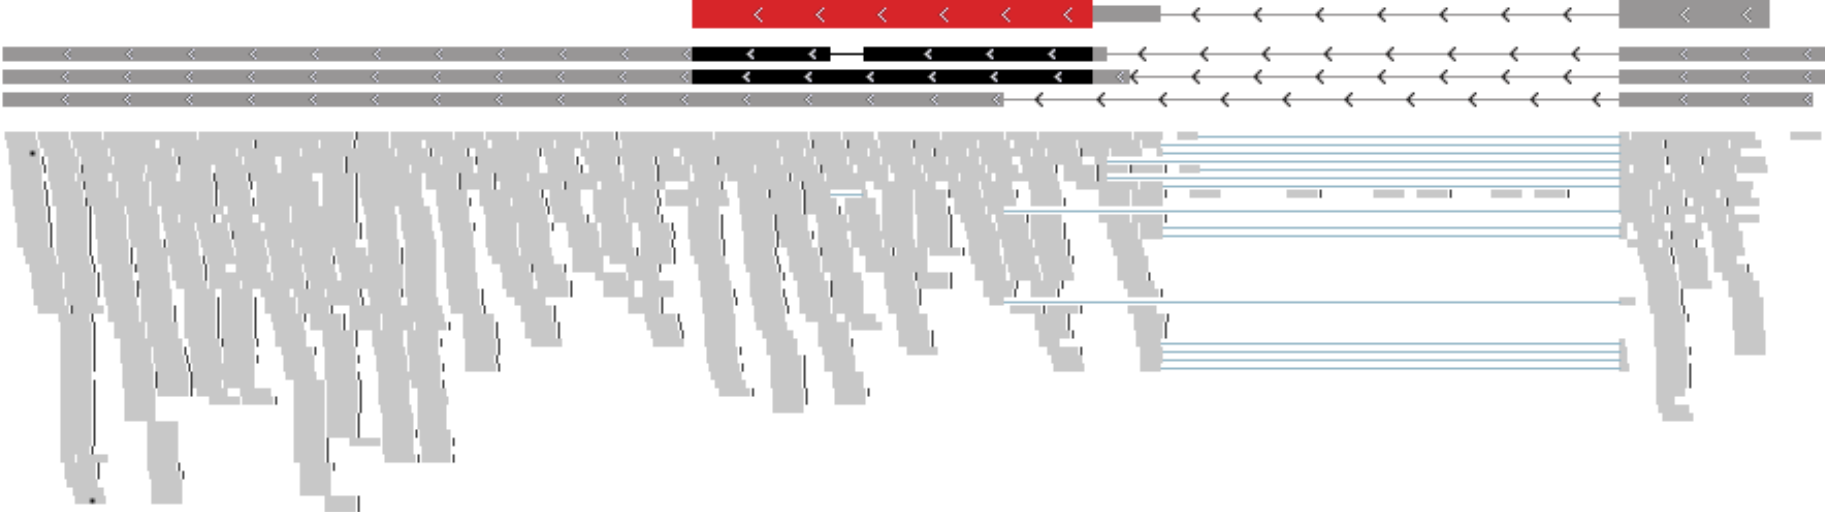

# Vmn1r69 - Supported

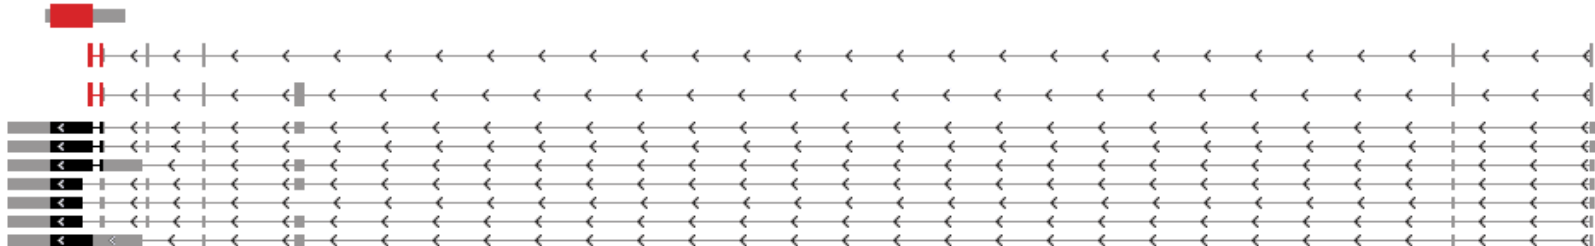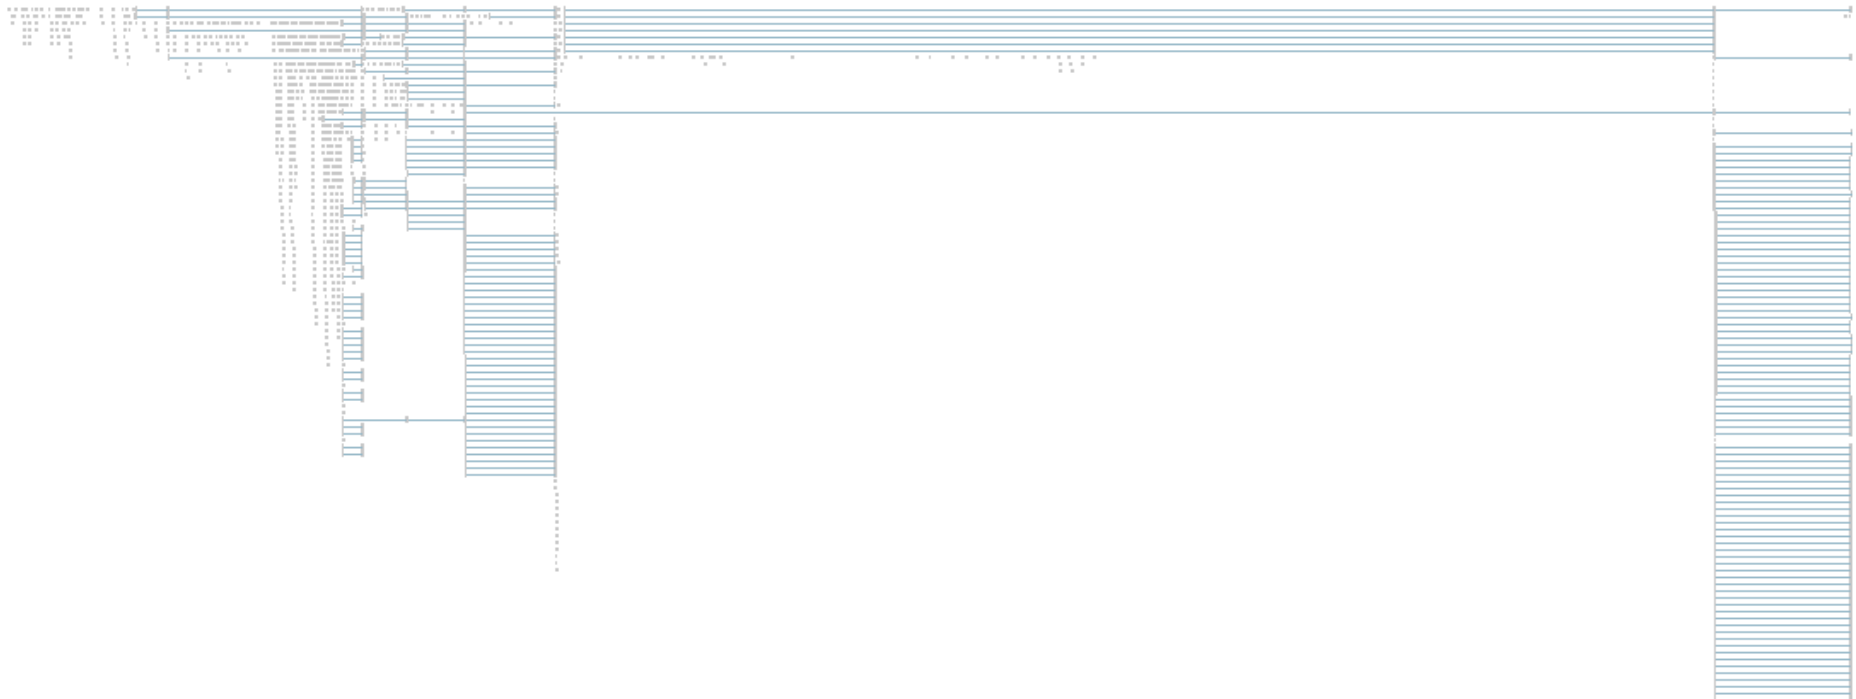

**Vmn1r139 – Supported** (only the relevant part of the gene model is shown, as the whole transcript is > 28Kb long)

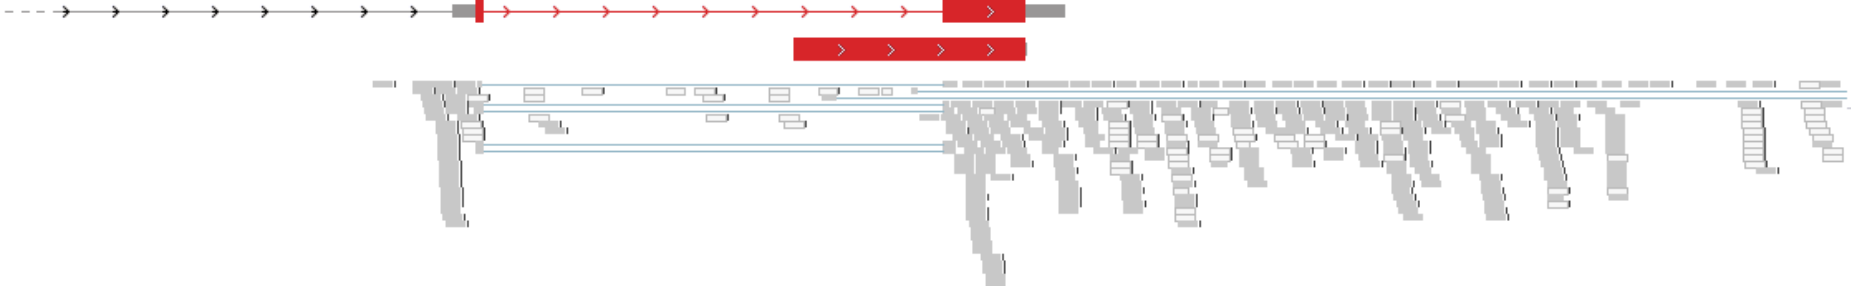

Supplement: pgen.1004593.s019.pdf [file pgen.1004593.s019.pdf]
