# Supplementary material for: The Olfactory Transcriptomes of Mice
Source: PubMed Central journal article supplement (PMC4154679; doi:10.1371/journal.pgen.1004593), 2014-09-04

## Dataset S9

We compared the 5' end of the OR gene models reconstructed by Cufflinks with the 5' ends proposed by Plessey et al. (2012) obtained through nanoCAGE. We inspected the sequencing data for the 25 genes with the largest differences in the proposed 5' end. The discrepancy can be explained by one of four scenarios:

| Scenario | Reason for discrepancy                                            | # of cases |
|----------|-------------------------------------------------------------------|------------|
| 1        | reads support Cufflinks                                           | 10         |
| 2        | reads support Cufflinks<br>nanoCAGE 5' overlaps 3' of adjacent OR | 12         |
| 3        | 5' end of a different gene                                        | 2          |
| 4        | reads support nanoCAGE                                            | 1          |
|          |                                                                   | 25         |

We show a representative example of each scenario below. In red are the Ensembl gene models. In black is the reconstructed gene model by Cufflinks, if any. The non-coding regions are shown in grey. In blue is the data provided by Plessey et al. (2012). Arrows indicate whether the gene is in the forward or reverse strand. The sequencing reads are drawn below in grey, and blue lines join fragments that span exon junctions.

**Scenario 1** – In these cases the sequencing data supports the reconstruction done by Cufflinks and there are no reads to support the proposed 5' end in the nanoCAGE data.

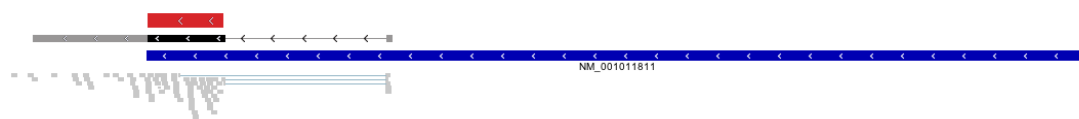

**Scenario 2** – Similar to scenario 1, but the proposed 5' end by nanoCAGE overlaps the 3' end of an adjacent OR gene as proposed by Cufflinks. Data shown from Plessey et al. is for *Olfir12*.

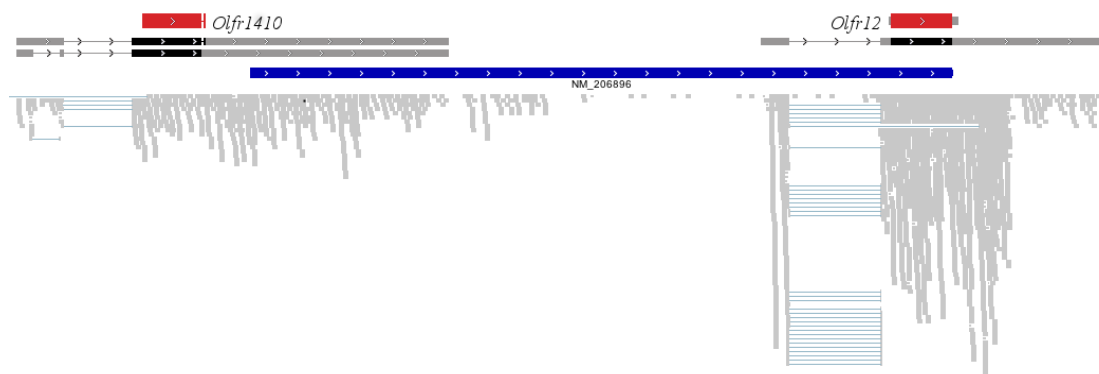

**Scenario 3** – The 5' proposed by nanoCAGE actually corresponds to a different gene (that sometimes is not annotated in Ensembl) and not to the proposed OR.

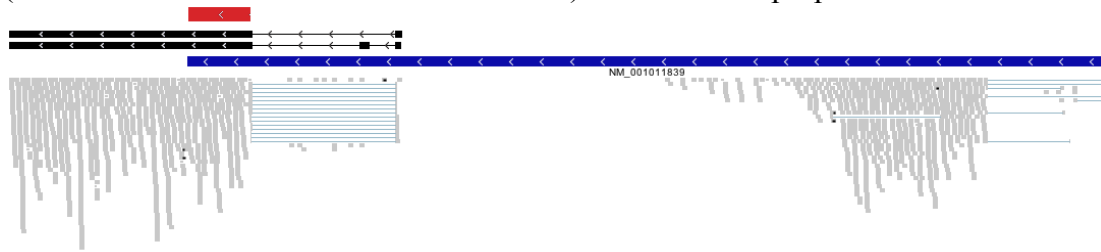

**Scenario 4** – The sequencing reads support the end proposed by nanoCAGE and Cufflinks wasn't able to reconstruct the full-length model.

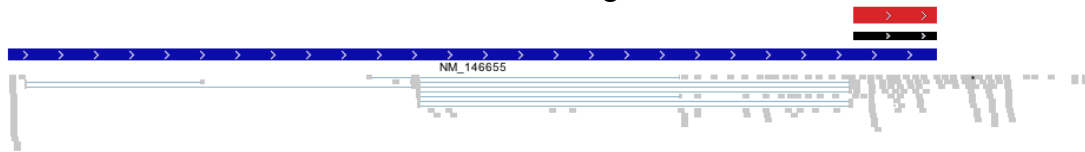

Supplement: pgen.1004593.s020.pdf [file pgen.1004593.s020.pdf]
